# Supplementary material for: Changes in the Antioxidative Activity and the Content of Phenolics and Iridoids during Fermentation and Aging of Natural Fruit Meads
Source: MDPI journal article supplement (doi:10.3390/biom11081113), 2021-07-28
Supplement: s1 [file s1]

# Changes in the Antioxidative Activity and the Content of Phenolics and Iridoids during Fermentation and Aging of Natural Fruit Meads

Kinga Adamenko <sup>1,\*</sup>, Joanna Kawa-Rygielska <sup>1</sup>, Alicja Z. Kucharska <sup>2</sup>, Adam Głowacki <sup>1</sup> and Narcyz Piórecki <sup>3,4</sup>

<sup>1</sup> Department of Fermentation and Cereals Technology, Wrocław University of Environmental and Life Sciences, 51-630 Wrocław, Poland; joanna.kawa-rygielska@upwr.edu.pl (J.K.-R.); adam.glowacki@upwr.edu.pl (A.G.)

<sup>2</sup> Vegetable and Plant Nutraceutical Technology, Department of Fruit, Wrocław University of Environmental and Life Sciences, 51-630 Wrocław, Poland; alicja.kucharska@upwr.edu.pl

<sup>3</sup> Institute and Arboretum of Physiography in Bolestraszyce, 37-700 Przemysław, Poland; narcyz360@gmail.com

<sup>4</sup> Faculty of Physical Education, University of Rzeszów, Towarnickiego 3, 35-959 Rzeszów, Poland

\* Correspondence: kinga.adamenko@upwr.edu.pl; Tel.: +48-71-323-9418

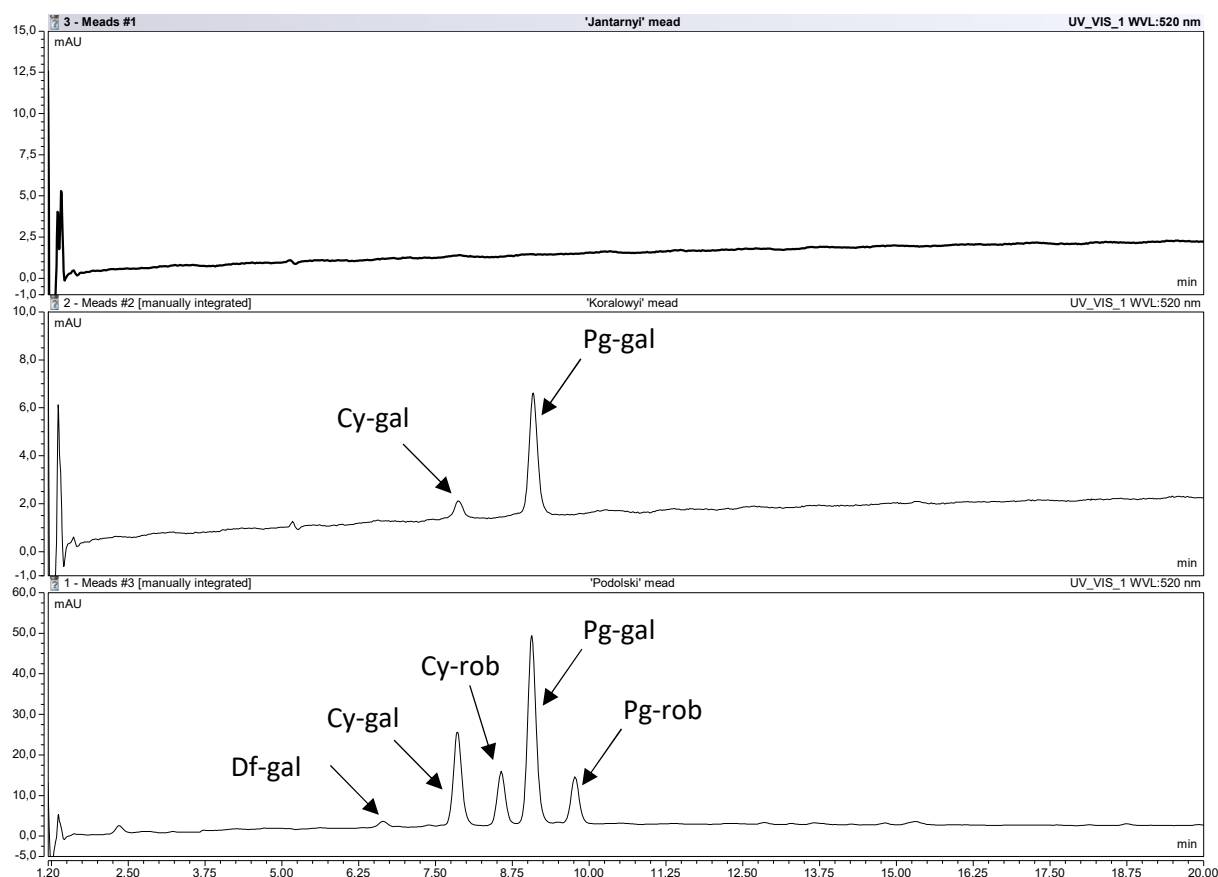

Figure S1. HPLC-PDA chromatograms (520 nm) of anthocyanins of fruit meads: **Df-gal**—delphinidin 3-*O*-galactoside; **Cy-gal**—cyanidin 3-*O*-galactoside; **Cy-rob**—cyanidin 3-*O*-robinobioside; **Pg-gal**—pelargonidin 3-*O*-galactoside; **Pg-rob**—pelargonidin 3-*O*-robinobioside

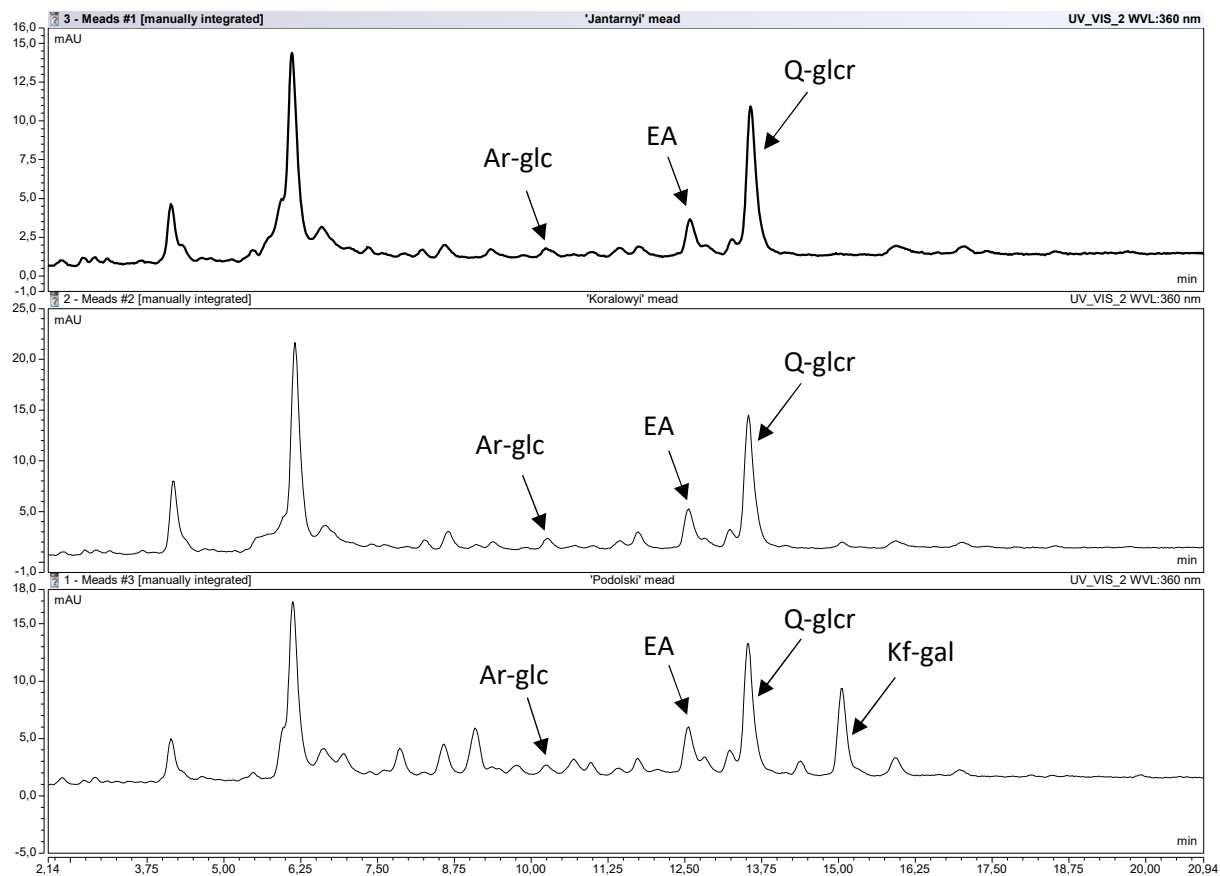

Figure S2. HPLC-PDA chromatograms (360 nm) of flavonols and ellagic acid of fruit meads: **Ar-glc**—aromadendrin 7-*O*-glucoside; **EA**—ellagic acid; **Q-glc**—quercetin 3-*O*-glucuronide, **Kf-gal**—kaempferol 3-*O*-galactoside.

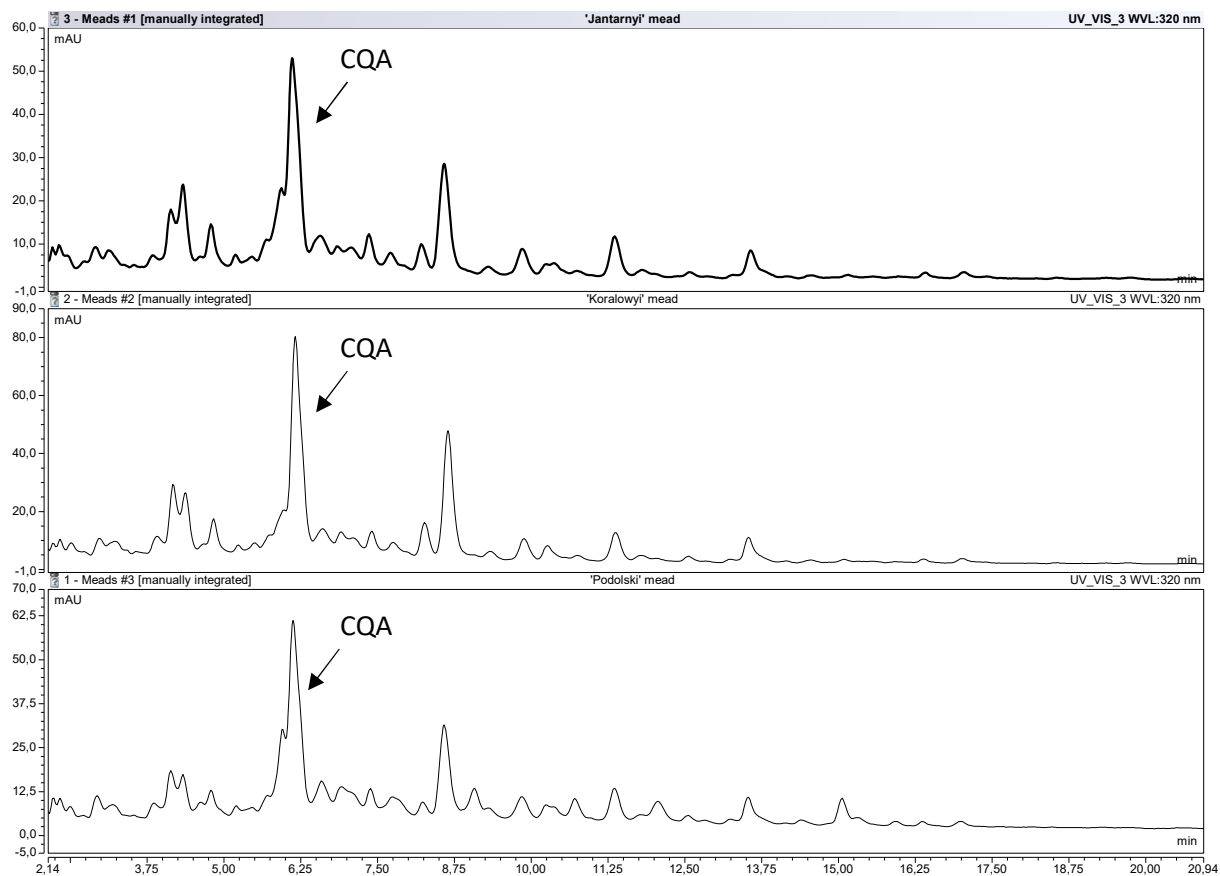

Figure S3. HPLC-PDA chromatograms (320 nm) of phenolic acids of fruit meads: **CQA**–caffeoylquinic acids.

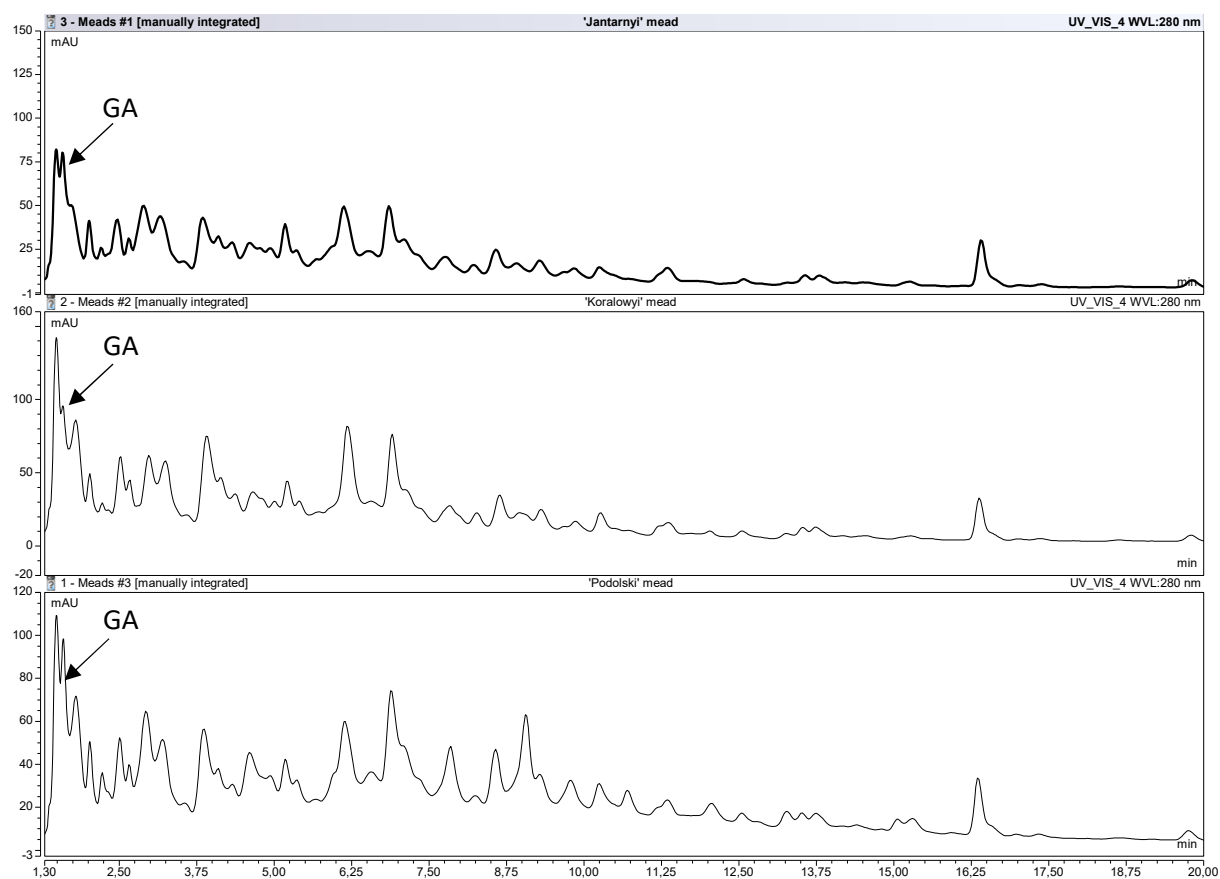

Figure S4. HPLC-PDA chromatograms (280 nm) of phenolic acids of fruit meads: **GA**—gallic acid.

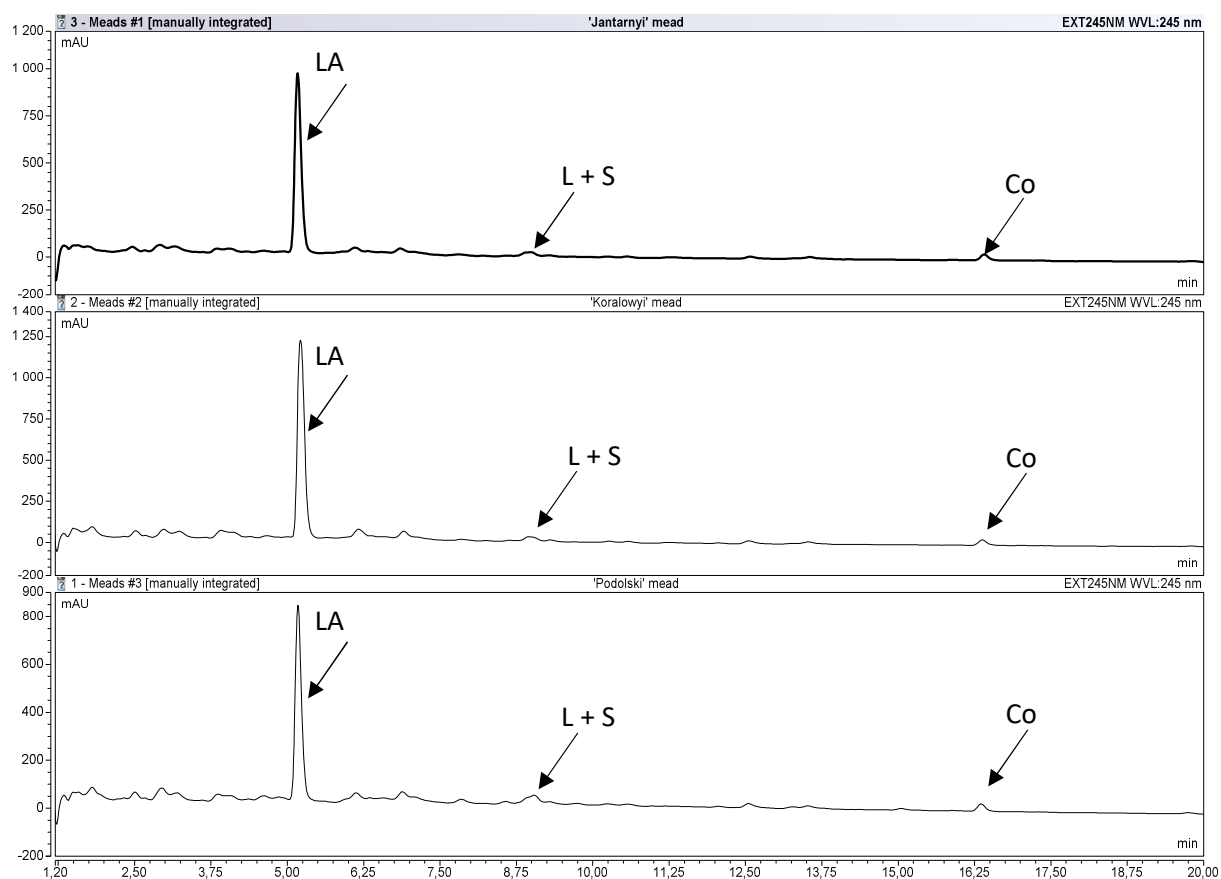

Figure S5. HPLC-PDA chromatograms (245 nm) of iridoids of fruit meads: **LA**—loganic acid; **L**—loganine; **S**—sweroside; **Co**—cornuside.

Table S1. Identification (UPLC retention times, spectra UV/Vis, and MS) of compounds of cornelian cherry juice by LC-MS.

| Peak No. | $t_{R\text{ LC-MS}}$ (min) | Compound                                | UV/Vis $\lambda_{\text{max}}$ (nm) | $[M - H]^-/[M + H]^+$ ( $m/z$ ) | Other ions ( $m/z$ )               |
|----------|----------------------------|-----------------------------------------|------------------------------------|---------------------------------|------------------------------------|
| 1        | 3.7                        | Gallic acid                             | 272                                | 169                             | -                                  |
| 2        | 4.9                        | Loganic acid                            | 246                                | 375 (377 <sup>+</sup> )         | 213 (215 <sup>+</sup> )            |
| 3        | 5.8                        | Caffeoylquinic acid                     | 324                                | 353                             | 191                                |
| 4        | 5.73                       | Loganin                                 | 246                                | 389                             | 227<br>435 $[M + \text{HCOO-H}]^-$ |
| 5        | 5.73                       | Sweroside                               | 246                                | 357                             | 195<br>403 $[M + \text{HCOO-H}]^-$ |
| 6        | 6.3                        | Delphinidin 3- <i>O</i> -galactoside    | 524                                | 463 <sup>+</sup>                | 303 <sup>+</sup>                   |
| 7        | 7.6                        | Cyanidin 3- <i>O</i> -galactoside;      | 515                                | 449 <sup>+</sup>                | 287 <sup>+</sup>                   |
| 8        | 8.3                        | Cyanidin 3- <i>O</i> -robinobioside     | 516                                | 595 <sup>+</sup>                | 287 <sup>+</sup>                   |
| 9        | 8.8                        | Pelargonidin 3- <i>O</i> -galactoside   | 501                                | 433 <sup>+</sup>                | 271 <sup>+</sup>                   |
| 10       | 9.5                        | Pelargonidin 3- <i>O</i> -robinobioside | 501                                | 579 <sup>+</sup>                | 271 <sup>+</sup>                   |
| 11       |                            | Aromadendrin 7- <i>O</i> -glucoside     | 295                                | 449                             | 287                                |
| 12       | 12.3                       | Ellagic acid                            | 254/362                            | 301                             | -                                  |
| 13       | 13.2                       | Quercetin 3- <i>O</i> -glucuronide      | 354                                | 477                             | 301                                |
| 14       | 14.8                       | Kaempferol 3- <i>O</i> -galactoside     | 348                                | 447                             | 285                                |
| 15       | 16.1                       | Cornuside                               | 245/273                            | 541 (543 <sup>+</sup> )         | 169 (171 <sup>+</sup> )            |

### Identification of iridoids and polyphenols by LC-MS

The method was previously described by Kucharska et al. [2017]. Identification of compounds was performed using the Acquity ultra-performance liquid chromatography (UPLC) system, coupled with a quadrupole-time of flight (Q-TOF) MS instrument (UPLC/Synapt Q-TOF MS, Waters Corp., Milford, MA, USA), with an electrospray ionization (ESI) source. Separation was achieved on an Acquity BEH C18 column (100 mm × 2.1 mm i.d., 1.7 μm; Waters). The mobile phase was a mixture of 2.0% aq. formic acid v/v (A) and acetonitrile (B). The gradient program was as follows: initial conditions—1% B in A, 12 min—25% B in A, 12.5 min—100% B, 13.5 min—1% B in A. The flow rate was 0.45 mL/min and the injection volume was 5 μL. The column was operated at 30 °C. UV-vis absorption spectra were recorded on-line during UPLC analysis, and the spectral measurements were made in the wavelength range of 200–600 nm, in steps of 2 nm. The major operating parameters for the Q-TOF MS were set as follows: capillary voltage 2.0 kV, cone voltage 40 V, cone gas flow of 11 L/h, collision energy 28–30 eV, source temperature 100 °C, desolvation temperature 250 °C, collision gas, argon; desolvation gas (nitrogen) flow rate, 600 L/h; data acquisition range,  $m/z$  100–1000 Da; ionization mode, negative (iridoids, phenolic acids, flavonols) and positive (anthocyanins). The data were collected with Mass-Lynx™ V 4.1 software (Waters Corp., Milford, MA, USA). The runs were monitored at the following wavelengths: iridoids at 245 nm, phenolic acids at 320 nm, 254 nm, 280 nm, flavonols at 360 nm, anthocyanins at 520 nm.

Kucharska, A.Z.; Sokół-Lętowska, A.; Oszmiański, J.; Piórecki, N.; Fecka, I. Iridoids, phenolic compounds and antioxidant activity of edible honeysuckle berries (*Lonicera caerulea* var. *kamtschatica* Sevest.). *Molecules* **2017**, *22*, 405–425.
